# Supplementary material for: Maternal outcomes at 3 months after planned caesarean section versus planned vaginal birth for twin pregnancies in the Twin Birth Study: a randomised controlled trial
Source: PubMed Central journal article supplement — BJOG. 2015 Aug 20;122(12):1653–62. doi: 10.1111/1471-0528.13597 (PMC5014197; doi:10.1111/1471-0528.13597), 2015-08-20
Supplement: BJO-122-1653-s001.pdf [file BJO-122-1653-s001.pdf]

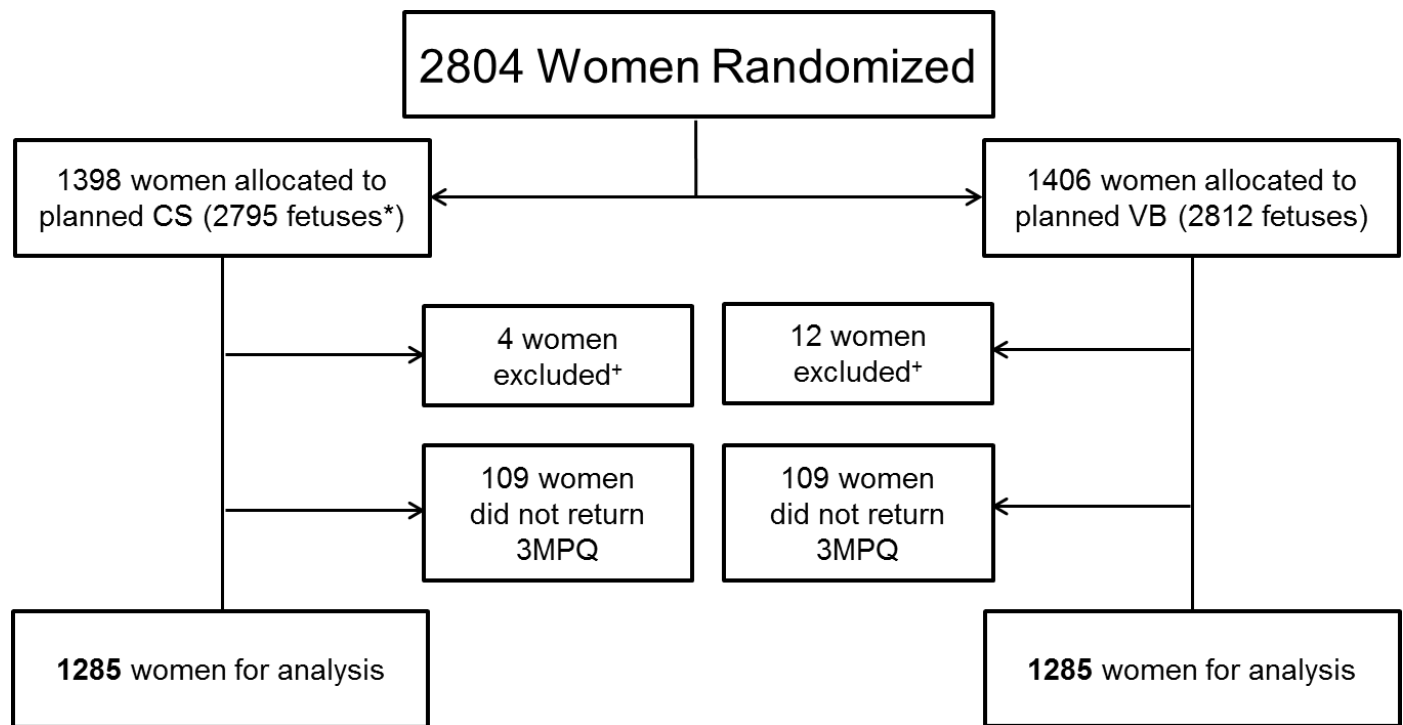

**Figure S1.** Consort diagram of participants in the 3-month Twin Birth Study follow-up questionnaire. (\*) One woman in the planned CS group had a singleton pregnancy. (+) Excluded from the primary analysis and did not return a 3-month postpartum questionnaire.
