# Supplementary material for: Maternal outcomes at 3 months after planned caesarean section versus planned vaginal birth for twin pregnancies in the Twin Birth Study: a randomised controlled trial
Source: PubMed Central journal article supplement — BJOG. 2015 Aug 20;122(12):1653–62. doi: 10.1111/1471-0528.13597 (PMC5014197; doi:10.1111/1471-0528.13597), 2015-08-20
Supplement: BJO-122-1653-s002.pdf [file BJO-122-1653-s002.pdf]

**Table S1.** Likelihood of Breastfeeding either infant by mode of delivery

| Events                                                                          | No./Total (%)                                   |                               |                   |                                                |                               |                   |
|---------------------------------------------------------------------------------|-------------------------------------------------|-------------------------------|-------------------|------------------------------------------------|-------------------------------|-------------------|
|                                                                                 | Planned Cesarean Delivery (n=1285) <sup>*</sup> |                               |                   | Planned Vaginal Delivery (n=1285) <sup>*</sup> |                               |                   |
|                                                                                 | Any Cesarean Delivery (n=1163)                  | Only Vaginal Delivery (n=120) | Total (n=1285)    | Any Cesarean Delivery (n=548)                  | Only Vaginal Delivery (n=736) | Total (n=1285)    |
| Breastfed either baby at any time                                               | 976 (83.92%)                                    | 107 (89.17%)                  | 1084 (84.36%)     | 487 (88.87%)                                   | 622 (84.51%)                  | 1110 (86.38%)     |
| Still breast feeding at completion of questionnaire                             | 675 (69.16%)                                    | 72 (67.29%)                   | 747 (68.91%)      | 326 (66.94%)                                   | 442 (71.06%)                  | 769 (69.28%)      |
| Missing                                                                         | 5 (0.43%)                                       | 1 (0.83%)                     | 6 (0.47%)         | 4 (0.73%)                                      | 3 (0.41%)                     | 7 (0.54%)         |
| Still breast feeding at 3 mos.                                                  | 724 (74.18%)                                    | 80 (74.77%)                   | 804 (74.17%)      | 359 (73.72%)                                   | 478 (76.85%)                  | 838 (75.50%)      |
| Stopped breast feeding                                                          | 234 (23.98%)                                    | 26 (24.30%)                   | 260 (23.99%)      | 116 (23.82%)                                   | 136 (21.86%)                  | 252 (22.70%)      |
| Missing                                                                         | 18 (1.84%)                                      | 1 (0.93%)                     | 20 (1.85%)        | 12 (2.46%)                                     | 8 (1.29%)                     | 20 (1.80%)        |
| Stopped breast feeding <15 days                                                 | 32/234 (13.68%)                                 | 0/26 (0.00%)                  | 32/260 (12.31%)   | 22/116 (18.97%)                                | 23/136 (16.91%)               | 45/252 (17.86%)   |
| Median days (5 <sup>th</sup> -95 <sup>th</sup> ile) either infant was breastfed | 95.0 (23.0-234.0)                               | 96.50 (33.0-226.0)            | 95.0 (25.0-229.0) | 96.00 (15.0-224.0)                             | 94.00 (21.0-191.0)            | 95.0 (16.0-205.0) |
| missing                                                                         | 18 (1.84%)                                      | 1 (0.99%)                     | 20 (1.85%)        | 12 (2.46%)                                     | 8 (1.29%)                     | 20 (1.80%)        |

<sup>\*</sup> Cases where mode of delivery is unknown (CS group = 2, VB group = 1)

**Table S2.** Maternal Quality of Life, Fatigue and Depression by mode of delivery

| Events                                                                                   | No./Total (%)                                   |                               |                  |                                                |                               |                  |
|------------------------------------------------------------------------------------------|-------------------------------------------------|-------------------------------|------------------|------------------------------------------------|-------------------------------|------------------|
|                                                                                          | Planned Cesarean Delivery (n=1285) <sup>‡</sup> |                               |                  | Planned Vaginal Delivery (n=1285) <sup>‡</sup> |                               |                  |
|                                                                                          | Any Cesarean Delivery (n=1163)                  | Only Vaginal Delivery (n=120) | Total (n=1285)   | Any Cesarean Delivery (n=548)                  | Only Vaginal Delivery (n=736) | Total (n=1285)   |
| Maternal Quality of Life (SF36 <sup>†</sup> )                                            | Mean ± SD                                       | Mean ± SD                     | Mean ± SD        | Mean ± SD                                      | Mean ± SD                     | Mean ± SD        |
| Physical                                                                                 | 51.7 ± 7.2                                      | 53.0 ± 6.7                    | 51.8 ± 7.1       | 50.8 ± 7.7                                     | 52.2 ± 7.5                    | 51.6 ± 7.6       |
| Mental                                                                                   | 46.9 ± 10.8                                     | 45.4 ± 11.1                   | 46.7 ± 10.9      | 44.8 ± 11.7                                    | 46.8 ± 10.9                   | 46.0 ± 11.3      |
| Missing                                                                                  | 26                                              | 1                             | 27               | 15                                             | 10                            | 25               |
| Maternal Quality of Life (SF36 <sup>†</sup> )                                            | Mean ± SD                                       | Mean ± SD                     | Mean ± SD        | Mean ± SD                                      | Mean ± SD                     | Mean ± SD        |
| Physical Functioning [missing]                                                           | 51.0 ± 8.0 [4]                                  | 51.6 ± 6.8 [0]                | 51.1 ± 7.9 [4]   | 50.3 ± 8.3 [2]                                 | 51.5 ± 7.8 [0]                | 51.0 ± 8.0 [2]   |
| Physical Role [missing]                                                                  | 46.4 ± 9.6 [16]                                 | 47.6 ± 8.5 [1]                | 46.5 ± 9.5 [17]  | 45.1 ± 9.9 [8]                                 | 46.2 ± 9.8 [4]                | 45.7 ± 9.9 [12]  |
| Bodily Pain [missing]                                                                    | 52.0 ± 9.5 [6]                                  | 53.0 ± 10.2 [0]               | 52.1 ± 9.6 [6]   | 50.2 ± 9.6 [3]                                 | 52.9 ± 9.5 [1]                | 51.8 ± 9.6 [4]   |
| General Health [missing]                                                                 | 53.1 ± 8.8 [4]                                  | 53.2 ± 8.8 [0]                | 53.2 ± 8.8 [4]   | 52.1 ± 9.5 [3]                                 | 53.2 ± 8.7 [3]                | 52.7 ± 9.1 [6]   |
| Vitality [missing]                                                                       | 51.2 ± 10.0 [7]                                 | 49.4 ± 9.3 [0]                | 51.0 ± 10.0 [7]  | 49.0 ± 10.3 [2]                                | 51.5 ± 9.9 [1]                | 50.4 ± 10.2 [3]  |
| Social Functioning [missing]                                                             | 46.2 ± 9.8 [4]                                  | 46.4 ± 9.6 [0]                | 46.2 ± 9.8 [4]   | 44.9 ± 10.7 [1]                                | 46.6 ± 10.1 [0]               | 45.9 ± 10.4 [1]  |
| Emotional Role [missing]                                                                 | 44.8 ± 11.4 [15]                                | 45.1 ± 10.7 [1]               | 44.8 ± 11.3 [16] | 43.3 ± 11.9 [10]                               | 44.7 ± 11.3 [6]               | 44.1 ± 11.6 [16] |
| Mental Health[missing]                                                                   | 49.9 ± 10.6 [6]                                 | 48.2 ± 10.8 [0]               | 49.7 ± 10.6 [6]  | 47.8 ± 10.8 [2]                                | 49.9 ± 10.4 [2]               | 49.0 ± 10.6 [4]  |
| Global Fatigue Index Score <sup>Δ1</sup>                                                 | 20.2 ± 8.9                                      | 20.8 ± 8.4                    | 20.3 ± 8.8       | 21.6 ± 9.4                                     | 20.2 ± 9.2                    | 20.8 ± 9.3       |
| Missing                                                                                  | 33                                              | 1                             | 34               | 12                                             | 22                            | 34               |
| To what degree have you experienced fatigue <sup>Δ</sup><br><small>2(1-10 Scale)</small> | Mean = 4.1                                      | Mean = 4.5                    | Mean = 4.2       | Mean = 4.5                                     | Mean = 4.2                    | Mean = 4.3       |
| Not at all                                                                               | 283 (24.33%)                                    | 27 (22.50%)                   | 310 (24.12%)     | 123 (22.45%)                                   | 190 (25.82%)                  | 313 (24.36%)     |
| Missing                                                                                  | 33 (2.84%)                                      | 0 (0.00%)                     | 33 (2.57%)       | 11 (2.01%)                                     | 19 (2.58%)                    | 30 (2.33%)       |
| How severe is the fatigue you have been experiencing <sup>Δ</sup>                        | Mean = 4.3                                      | Mean = 4.6                    | Mean = 4.4       | Mean = 4.7                                     | Mean = 4.4                    | Mean = 4.5       |
| Missing                                                                                  | 291                                             | 24                            | 315              | 117                                            | 197                           | 314              |
| To what degree has fatigue caused you distress <sup>Δ</sup>                              | Mean = 3.4                                      | Mean = 3.2                    | Mean = 3.4       | Mean = 3.7                                     | Mean = 3.5                    | Mean = 3.6       |
| Missing                                                                                  | 291                                             | 24                            | 315              | 118                                            | 200                           | 318              |

|                                                                                                                |                   |                  |                   |                   |                   |                   |
|----------------------------------------------------------------------------------------------------------------|-------------------|------------------|-------------------|-------------------|-------------------|-------------------|
| In the past week, to what degree has fatigue interfered with your ability to care for or nurture your children | Mean = 2.2<br>347 | Mean = 2.2<br>30 | Mean = 2.2<br>377 | Mean = 2.5<br>136 | Mean = 2.3<br>244 | Mean = 2.4<br>380 |
| Missing                                                                                                        |                   |                  |                   |                   |                   |                   |
| Over the past week, how often have you been fatigued <sup>Δ</sup>                                              |                   |                  |                   |                   |                   |                   |
| Every day                                                                                                      | 92 (7.91%)        | 12 (10.00%)      | 105 (8.17%)       | 42 (7.66%)        | 68 (9.24%)        | 110 (8.56%)       |
| Most, but not all days                                                                                         | 258 (22.18%)      | 22 (18.33%)      | 280 (21.79%)      | 146 (26.64%)      | 9.24 (20.92%)     | 300 (23.35%)      |
| Occasionally, but not most days                                                                                | 427 (36.72%)      | 54 (45.00%)      | 482 (37.51%)      | 201 (36.68%)      | 242 (32.88%)      | 443 (34.47%)      |
| Hardly any days                                                                                                | 115 (9.89%)       | 12 (10.00%)      | 127 (9.88%)       | 50 (9.12%)        | 93 (12.64%)       | 144 (11.21%)      |
| Missing                                                                                                        | 271 (23.30%)      | 20 (16.67%)      | 291 (22.65%)      | 109 (19.89%)      | 179 (24.32%)      | 288 (22.41%)      |
| To what degree has your fatigue changed during the past week <sup>Δ</sup>                                      |                   |                  |                   |                   |                   |                   |
| Increased                                                                                                      | 41 (3.53%)        | 5 (4.17%)        | 47 (3.66%)        | 22 (4.01%)        | 26 (3.53%)        | 48 (3.74%)        |
| Fatigue has gone up and down                                                                                   | 254 (21.84%)      | 31 (25.83%)      | 285 (22.18%)      | 115 (20.99%)      | 143 (19.43%)      | 258 (20.08%)      |
| Stayed the same                                                                                                | 394 (33.88%)      | 39 (32.50%)      | 434 (33.77%)      | 207 (37.77%)      | 250 (33.97%)      | 458 (35.64%)      |
| Decreased                                                                                                      | 195 (16.77%)      | 25 (20.83%)      | 220 (17.12%)      | 95 (17.34%)       | 129 (17.53%)      | 224 (17.43%)      |
| Missing                                                                                                        | 279 (23.99%)      | 20 (16.67%)      | 299 (23.27%)      | 109 (19.89%)      | 188 (25.54%)      | 297 (23.11%)      |
| Edinburgh Postpartum Depression Scale mean score (SD)                                                          |                   |                  |                   |                   |                   |                   |
| >12                                                                                                            | 5.7 ± 5.5         | 6.1 ± 5.6        | 5.7 ± 5.6         | 6.4 ± 5.9         | 5.5 ± 5.5         | 5.9 ± 5.7         |
| ≥10                                                                                                            | 156 (13.41%)      | 23 (19.17%)      | 180 (14.01%)      | 91 (16.61%)       | 99 (13.45%)       | 190 (14.79%)      |
| Missing                                                                                                        | 266 (22.87%)      | 31 (25.83%)      | 298 (23.19%)      | 143 (26.09%)      | 163 (22.15%)      | 306 (23.81%)      |
| Thought of harming myself has occurred to me                                                                   | 2 (0.17%)         | 0 (0.00%)        | 2 (0.16%)         | 1 (0.18%)         | 2 (0.27%)         | 3 (0.23%)         |
| Never                                                                                                          | 1075 (92.43%)     | 111 (92.50%)     | 1187 (92.45%)     | 506 (92.34%)      | 678 (92.12%)      | 1185 (92.22%)     |
| Hardly ever                                                                                                    | 31 (2.67%)        | 7 (5.83%)        | 38 (2.96%)        | 23 (4.20%)        | 25 (3.40%)        | 48 (3.74%)        |
| Sometimes                                                                                                      | 47 (4.04%)        | 1 (0.83%)        | 48 (3.74%)        | 16 (2.92%)        | 25 (3.40%)        | 41 (3.19%)        |
| Yes, quite often                                                                                               | 8 (0.69%)         | 1 (0.83%)        | 9 (0.70%)         | 3 (0.55%)         | 6 (0.82%)         | 9 (0.70%)         |
| Missing                                                                                                        | 2 (0.17%)         | 0 (0.00%)        | 2 (0.16%)         | 0 (0.00%)         | 2 (0.27%)         | 2 (0.16%)         |

<sup>Δ</sup> Cases where mode of delivery is unknown (CS group = 2, VB group = 1)

<sup>†</sup> Measured by the SF36 <sup>Δ</sup>Multidimensional Assessment of Fatigue Scale total possible score 50 – severe fatigue

<sup>Δ</sup>Defined as a score of more than 12 on the Edinburgh Postnatal Depression Scale.

**Table S3.** Relationship with husband/partner, Sexual Intercourse, and Incontinence by mode of delivery

| Events                                                                       | No./Total (%)                                   |                               |                |                                                |                               |                |
|------------------------------------------------------------------------------|-------------------------------------------------|-------------------------------|----------------|------------------------------------------------|-------------------------------|----------------|
|                                                                              | Planned Cesarean Delivery (n=1285) <sup>a</sup> |                               |                | Planned Vaginal Delivery (n=1285) <sup>a</sup> |                               |                |
|                                                                              | Any Cesarean Delivery (n=1163)                  | Only Vaginal Delivery (n=120) | Total (n=1285) | Any Cesarean Delivery (n=548)                  | Only Vaginal Delivery (n=736) | Total (n=1285) |
| <b>Relationship with husband/partner</b>                                     |                                                 |                               |                |                                                |                               |                |
| Relationship with husband/partner since birth of babies                      |                                                 |                               |                |                                                |                               |                |
| Not applicable                                                               | 80 (6.88%)                                      | 7 (5.83%)                     | 89 (6.93%)     | 45 (8.21%)                                     | 45 (6.11%)                    | 90 (7.00%)     |
| Very happy or Somewhat happy                                                 | 1004 (86.33%)                                   | 105 (87.50%)                  | 1109 (86.30%)  | 458 (83.58%)                                   | 641 (87.09%)                  | 1100 (85.60%)  |
| Somewhat unhappy or Very unhappy                                             | 71 (6.10%)                                      | 7 (5.83%)                     | 78 (6.07%)     | 41 (7.48%)                                     | 42 (5.71%)                    | 83 (6.46%)     |
| Missing                                                                      | 8 (0.69%)                                       | 1 (0.83%)                     | 9 (0.70%)      | 4 (0.73%)                                      | 8 (1.09%)                     | 12 (0.93%)     |
| Relationship with husband/partner compared to before the birth of the babies |                                                 |                               |                |                                                |                               |                |
| Not applicable                                                               | 69 (5.93%)                                      | 7 (5.83%)                     | 78 (6.07%)     | 37 (6.75%)                                     | 39 (5.30%)                    | 76 (5.91%)     |
| Better                                                                       | 392 (33.71%)                                    | 34 (28.33%)                   | 426 (33.15%)   | 158 (28.83%)                                   | 267 (36.28%)                  | 426 (33.15%)   |
| About the same                                                               | 611 (52.54%)                                    | 64 (53.33%)                   | 675 (52.53%)   | 301 (54.93%)                                   | 367 (49.86%)                  | 668 (51.98%)   |
| Worse                                                                        | 78 (6.71%)                                      | 13 (10.83%)                   | 91 (7.08%)     | 45 (8.21%)                                     | 55 (7.47%)                    | 100 (7.78%)    |
| Missing                                                                      | 13 (1.12%)                                      | 2 (1.67%)                     | 15 (1.17%)     | 7 (1.28%)                                      | 8 (1.09%)                     | 15 (1.17%)     |
| <b>Sex</b>                                                                   |                                                 |                               |                |                                                |                               |                |
| Had sexual intercourse since the birth                                       | 955 (82.12%)                                    | 100 (83.33%)                  | 1056 (82.18%)  | 441 (80.47%)                                   | 601 (81.66%)                  | 1043 (81.17%)  |
| Missing                                                                      | 10 (0.86%)                                      | 2 (1.67%)                     | 12 (0.93%)     | 7 (1.28%)                                      | 5 (0.68%)                     | 12 (0.93%)     |
| Pain during sexual intercourse                                               | 232 (24.29%)                                    | 35 (35.00%)                   | 267 (25.28%)   | 132 (29.93%)                                   | 171 (28.45%)                  | 304 (29.15%)   |
| Missing                                                                      | 16 (1.68%)                                      | 3 (3.00%)                     | 19 (1.80%)     | 8 (1.81%)                                      | 4 (0.67%)                     | 12 (1.15%)     |
| Mild or small amount                                                         | 172                                             | 27                            | 199            | 102                                            | 137                           | 239            |
| Quite a lot of pain                                                          | 50                                              | 7                             | 57             | 27                                             | 29                            | 57             |
| Severe or excruciating/terrible                                              | 6                                               | 1                             | 7              | 2                                              | 2                             | 4              |

## Incontinence

|                                       |               |               |               |               |               |               |
|---------------------------------------|---------------|---------------|---------------|---------------|---------------|---------------|
| Experienced any urinary incontinence‡ | 123 (10.58%)  | 22 (18.33%)   | 145 (11.28%)  | 80 (14.60%)   | 117 (15.90%)  | 197 (15.33%)  |
| No problem at all                     | 53 (43.09%)   | 13 (59.09%)   | 66 (45.52%)   | 53 (66.25%)   | 54 (46.15%)   | 107 (54.31%)  |
| A little problem                      | 54 (43.90%)   | 7 (31.82%)    | 61 (42.07%)   | 21 (26.25%)   | 49 (41.88%)   | 70 (35.53%)   |
| A big problem                         | 9 (7.32%)     | 1 (4.55%)     | 10 (6.90%)    | 4 (5.00%)     | 9 (7.69%)     | 13 (6.60%)    |
| Missing                               | 7 (5.69%)     | 1 (4.55%)     | 8 (5.52%)     | 2 (2.50%)     | 5 (4.27%)     | 7 (3.55%)     |
| Problematic urinary incontinence¶     | 62 (5.3%)     | 8 (6.67%)     | 70 (5.45%)    | 25 (4.56%)    | 57 (7.74%)    | 82 (6.38%)    |
| Incontinence Impact Questionnaire-7‡  |               |               |               |               |               |               |
| Total Score Mean ± SD                 | 19.82 ± 20.88 | 25.60 ± 26.20 | 20.48 ± 21.41 | 16.76 ± 16.76 | 22.06 ± 21.02 | 20.44 ± 20.50 |
| Physical activity score               | 20.16 ± 24.73 | 25.00 ± 28.17 | 20.71 ± 24.97 | 14.67 ± 24.21 | 20.47 ± 21.37 | 18.70 ± 22.28 |
| Travel score                          | 17.20 ± 23.37 | 16.67 ± 25.20 | 17.14 ± 23.39 | 10.67 ± 17.27 | 17.54 ± 23.02 | 15.45 ± 21.56 |
| Social/Relationships score            | 20.43 ± 27.23 | 16.67 ± 25.20 | 20.00 ± 26.86 | 14.67 ± 25.60 | 21.64 ± 27.09 | 19.51 ± 26.68 |
| Emotional health score                | 21.77 ± 26.92 | 39.58 ± 37.73 | 23.81 ± 28.60 | 26.00 ± 25.95 | 28.36 ± 31.65 | 27.64 ± 29.89 |
| Missing                               | 1             | 0             | 1             | 0             | 1             | 1             |
| Experienced fecal incontinence‡       | 48 (4.13%)    | 1 (0.83%)     | 49 (3.81%)    | 24 (4.38%)    | 24 (3.26%)    | 48 (3.74%)    |
| No problem at all                     | 29 (60.42%)   | 1 (100.00%)   | 30 (61.22%)   | 16 (66.67%)   | 15 (62.50%)   | 31 (64.58%)   |
| A little problem                      | 15 (31.25%)   | 0 (0.00%)     | 15 (30.61%)   | 6 (25.00%)    | 6 (25.00%)    | 12 (25.00%)   |
| A big problem                         | 3 (6.25%)     | 0 (0.00%)     | 3 (6.12%)     | 2 (8.33%)     | 3 (12.50%)    | 5 (10.42%)    |
| Missing                               | 1 (2.08%)     | 0 (0.00%)     | 1 (2.04%)     | 0 (0.00%)     | 0 (0.00%)     | 0 (0.00%)     |
| Problematic fecal incontinence¶       | 18 (1.55%)    | 0 (0.00%)     | 18 (1.41%)    | 8 (1.46%)     | 9 (1.22%)     | 17 (1.33%)    |
| Experienced incontinence of flatus‡   | 187 (16.08%)  | 18 (15.00%)   | 205 (15.95%)  | 112 (20.44%)  | 112 (15.22%)  | 225 (17.51%)  |
| No problem at all                     | 130 (69.52%)  | 10 (55.56%)   | 140 (68.29%)  | 74 (66.07%)   | 71 (63.39%)   | 145 (64.44%)  |
| A little problem                      | 47 (25.13%)   | 7 (38.89%)    | 54 (26.34%)   | 31 (27.68%)   | 32 (28.57%)   | 64 (28.44%)   |
| A big problem                         | 7 (3.74%)     | 1 (5.56%)     | 8 (3.90%)     | 6 (5.36%)     | 9 (8.04%)     | 15 (6.67%)    |
| Missing                               | 3 (1.60%)     | 0 (0.00%)     | 3 (1.46)      | 1 (0.89%)     | 0 (0.00%)     | 1 (0.44%)     |
| Problematic flatal incontinence¶      | 54 (4.64%)    | 8 (6.67%)     | 62 (4.82%)    | 37 (6.75%)    | 41 (5.57%)    | 79 (6.15%)    |

\* Cases where mode of delivery is unknown (CS group = 2, VB group = 1)

† Problematic Incontinence was described as a little or big problem of losing or leaking urine when coughing, laughing, or sneezing, etc (urinary); losing or leaking feces/stool, fluid or mucus unexpectedly from the bowels (fecal); or passing gas/wind unexpectedly (flatal) within the past 7 days.

‡ Women who report problematic incontinence were asked to complete additional validated questions about the impact of the incontinence, using the IIQ-7 with score ranging from 0 (no impact at all) to 100 (greatly impacted).

¶ Defined a priori as a little or big problem with incontinence.
