# Supplementary material for: Maternal outcomes at 3 months after planned caesarean section versus planned vaginal birth for twin pregnancies in the Twin Birth Study: a randomised controlled trial
Source: PubMed Central journal article supplement — BJOG. 2015 Aug 20;122(12):1653–62. doi: 10.1111/1471-0528.13597 (PMC5014197; doi:10.1111/1471-0528.13597), 2015-08-20
Supplement: BJO-122-1653-s003.pdf [file BJO-122-1653-s003.pdf]

## **Appendix S1. The Twin Birth Study Collaborative Group**

ARGENTINA: Hospital Penna, Bahia Blanca: Jose Luis Castaldi, Carlos Deguer, Marta Susana Bertin, Yamil Partida; Hospital Alvarez, Buenos Aires: Diana Galimberti, Analia Messina; Hospital Juan A Fernandez, Buenos Aires: Liliana S Voto, Geraldine N Voto, Marìa Josè Prieto, Fernanda Buraschi, Hèctor Sexer; Hospital Posadas, Buenos Aires: Mario Palermo, Dolores Montes Varela, Florencio Franzé, Patricia Benitez and Valeria Garcia; Hospital Ramos Mejia, Buenos Aires: Ricardo Savransky, Armando Dunaievsky; Hospital Sarda, Buenos Aires: Elsa Andina, Cristina LATERA, Sandra Susacasa, Maria Alejandra Frailuna, Silvina Ramirez Almansa, Maria Beatriz Barrere, Horacio García; Hospital Angela Iglesia de Llano, Corrientes: Mabel Rivero, Elena Elizabet Gomez, Josefina Schinini, Monica Ahlbom; Hospital JR Vidal, Corrientes: Jesus Daniel Aguirre, Elba Mirta Alicia Morales, Griselda Itati Abreo, Maria Teresa de Sagastizabal; Hospital LC Lagomaggiore, Mendoza: Raquel de Lourdes Martín, Arturo Videla, Walter Mesas; Hospital JM Cullen, Santa Fe: Carlos Arias, Maria Cecilia Castagnola; Hospital Ramon Carrillo, Santiago del Estero: Raul Abalos Gorostiaga, Miguel Curioni; Hospital Avellaneda, Tucuman: Maria Mohedano, Viviana Dip, Alicia Roque, Esteban Marcos Duhalde; AUSTRALIA: Women's and Children's Hospital, Adelaide: Jodie Dodd, Andrea Deussen, Caroline Crowther; Mater Mothers' Hospital, Brisbane: Glenn Gardener, Jackie Chaplin; Monash Medical Centre, Clayton: Danielle Wilkins; Ipswich Hospital, Ipswich: Kassam Mahomed, Anne Green, Robert Baade; Logan Hospital, Meadowbrook: Mano Haran, Ash Hanafy; St George Hospital, Sydney: Greg Davis, Lynne Roberts; Toowoomba Base Hospital, Toowoomba: Stephen Tucker, Christine Duncan; Townsville Hospital, Townsville: David Watson, Annemarie Lawrence; BELGIUM: Vrije Universiteit Brussel, Brussels: Monika Laubach, Ria Breugelmans; BRAZIL: Botucatu Medical School, Botucatu: Iracema Calderon, Anice Martins, Claudia Magalhães; University of Campinas, Campinas: Jose Guilherme Cecatti, Fernanda Garanhani Surita; Hospital Materno Infantil, Goiania: Luiza Rosado, Augusto Cortizo Vidal, Goianice Ribeiro de Souza; Hospital Universitario de Jundiai, Jundiai: Nelson Lourenço Maia Filho, Danielly Scaranello Nunes Santana; Hospital Universitario

Antonio Pedro, Niteroi; Renato Augusto Moreira de Sa, Luciano Marcolino; Hospital Sao Lucas, Porto Alegre; Caio Coelho Marques, Pedro Luis Zanella, Carla Milan, Márcia Dalmolin Bollis, Gustavo Steibel; ISCMPA-Maternidade Mario Totta, Porto Alegre; Antonio CK Ayub, Simone Moreira; Hospital das Clinicas da UFPE, Recife; Antonio Carlos Barbosa Lima; Instituto de Medicina Integral Prof. Fernando Figueira (IMIP), Recife; Adriana Scavuzzi, Alex Sandro Rolland de Souza; University of Pernambuco, Recife; Olimpio Barbosa de Moraes Filho, Simone Angélica Leita Silva Carvalho; Maternidade Escola da UFRJ, Rio de Janeiro; Renato Augusto Moreira de Sa, Rita Guerios Bornia, Nancy Ribeiro da Silva; Perinatal, Rio de Janeiro; Renato Augusto Moreira de Sa, Renata Spinola, Laudelino Marques Lopes; Maternidade Escola de Vila Nova Cachoeirinha, Sao Paulo; Nelson Sass, Henri Korkes, Elisa Chalem, Eliana Junko Morita Yokota, Miriam Ribeiro de Faria Silveira;

CANADA: Foothills Medical Centre, Calgary: Stephen Wood, Leslie Miller; IWK Health Centre, Halifax: Lynne McLeod, B Anthony Armson, Cora Fanning; McMaster University Medical Centre, Hamilton: Valerie Mueller, Sandra Gregorovich, Elaine Moore; St Joseph's Health Care, London: Robert Gratton, Laura Kennedy; Trillium Health Centre, Mississauga: Peter Scheufler, Donna Reid; SMBD Jewish General Hospital, Montreal: Stephanie Klam, Rhona Daitchman, Royal Columbian Hospital, New Westminster: Duncan Farquharson, Kristy Harrison; North Bay General Hospital, North Bay: Ramesh Kulkarni, Rhonda Scarfone, Joanne Laplante; Regina General Hospital, Regina: George Carson, Suzanne Williams; York Central Hospital, Richmond Hill: David Rosman, Debbie Nemtean; Royal University Hospital, Saskatoon: Femi Olatunbosun, Kathleen Pierson; Women's Health Centre, St John's: Joan Crane, Donna Hutchens, Mount Sinai Hospital, Toronto: Nanette Okun; Sunnybrook Health Sciences Centre, Toronto: Arthur Zaltz, Melissa Brown; Toronto East General, Toronto: Melanie Ornstein, Soraya Visram, Jennifer Bordin, Hiliary Siurna, Shelly Petruskavich; Lion's Gate Hospital, Vancouver: Stephen Kaye, Kelly-Ann Haslauer; St Paul's Hospital, Vancouver: Geoffrey Cundiff; CHILE: Hospital Dr Sotero del Rio, Puente Alto: Ricardo Gomez, Juan Pedro Kusanovic, Karla Silva Neculman; Hospital Dr Gustavo Fricke, Vina del Mar: Luis Leighton Valenzuela, Erika

Madariaga Leiva, Juan Guillermo Romo Cabrera, Mónica Molina Ravanal, Rodrigo Schiaffino Orrego; CROATIA: Sveti Duh Hospital, Zagreb: Ratko Matijevic; EGYPT: Assiut University Hospital, Assiut: Ahmad Makhoulf, Osama Saber, Tarek Abdelradey; ESTONIA: Tartu University Hospital - Women's Clinic, Tartu: Fred Kirss, Kristiina Rull, Pille Vaas; GERMANY: CUB - Benjamin Franklin, Berlin: Hartmut Hopp, Andreas Nonnenmacher; CUB - Virchow Klinikum, Berlin: Silke Michaelis; Ludwig Maximilians University of Munich, Munich: Uwe Hasbargen, Maria Delius; HUNGARY: University of Debrecen, Debrecen: Tamás Major, Tünde Bartha; ISRAEL: HaEmek Medical Center, Afula: Raed Salim; Ma'ayney HaYeshua Medical Center, Bnei Brak: Linda Harel, Benny Chayen, Sima Siev; Hillel Yaffe Medical Center, Hadera: Mordechai Hallak, Elad Mei-Dan; Bnai Zion Medical Center, Haifa: Ron Gonen, Leslie Wolff; Edith Wolfson Medical Center, Holon: Oscar Sadan; Holy Family Hospital, Nazareth: Dalia Mansour-Schwake, Liana Petchinkin; Nazareth Hospital (EMMS), Nazareth: Marwan Hakim; Poriya Government Hospital, Tiberias: Yuri Perlitz, Moshe Ben-Ami, Samuel Pansky; JAMAICA: University Hospital of the West Indies, Kingston: Donnette Simms-Stewart, Monifa Wilson; JORDAN: Islamic Hospital, Amman: Mazen El-Zibdeh, Lama AlFaris; THE NETHERLANDS: Sint Lucas Andreas Ziekenhuis, Amsterdam: Marion Heres, Aafje Sluis; Atrium Medical Center, Heerlen: Frans JME Roumen, Jeannine Rinkens; Academisch Ziekenhuis Maastricht, Maastricht: Christine Willekes; Maaslandziekenhuis Sittard, Sittard: Sjaak Alleman, Simone Gordijn van Zandvoort; Maxima Medical Centre, Veldhoven: Martina M Porath, Corine Verhoeven, Ben Willem Mol; OMAN: Khoula Hospital, Muscat: Forough Radfar, Sultana Khan; POLAND: Medical University of Gdansk, Gdansk: Krzysztof Preis, Malgorzata Swiatkowska-Freund; Polish Mother's Memorial Hospital, Lodz: Grzegorz Krasomski, Marcin Kesiak, Michael Krekora, Katarzyna Zych, Jan Wilczynski; University School of Medical Sciences, Poznan: Grzegorz Breborowicz, Anna Dera; QATAR: Hamad Medical Corporation, Doha: Sajjad ur Rahman, Amal Abdullah Al-Jassim; ROMANIA: University of Pharmacy and Medicine, Cluj-Napoca: Florin Stamatian, Gabriela Caracostea; SERBIA: University of Belgrade, Belgrade: Miroslava Gojnic, Amira Fazlagic, Milan

Perovic, Brankica Vasiljevic, Toma Stefanovic; SPAIN: Hospital Clinic-University of Barcelona, Barcelona: Anna Gonce, Sara Herrero Rodriguez, Marta Massanes; Hospital Vall d'Hebron, Barcelona: Elena Carreras Moratonas, Carlota Rodo Rodriguez, Silvia Arevalo Martinez, Elisa Llurba, Anna Suy Franch; Hospital La Paz, Madrid: Maria de la Calle, Fernando Dans, Marta Sancha, Sara Lopez; Complejo Hospitalario de Toledo, Toledo: Maria Luisa Canete Palomo, María Dolores Maldonado del Valle, María Nieves Rodríguez Martín, Carolina Lázaro-Carrasco Delgado, María Carmen Jiménez Fournier; UNITED KINGDOM: Basildon & Thurrock University Hospital, Basildon: Dale Ojutiku, Maxwell Masuku, Kerry Goodsell, Donna Southam; Bradford Royal Infirmary, Bradford: Derek Tuffnell, Tracey Germaine, Rebecca Palethorpe, Diane Farrar, Janet Wright; Queen Elizabeth Hospital, King's Lynn: Hamed Al-Taher, Helen Meehan; Liverpool Women's Hospital, Liverpool: Leanne Bricker, Michelle Dower, Gillian Houghton, Angela Pascall, Heather Longworth; Lewisham Hospital, London: Ashis Sau; Nottingham City Hospital, Nottingham: James Thornton, Joanne Fisher, Mohammed Houda, Andy Simm, George Bugg; Queen's Medical Centre, Nottingham: Ruta Deshpande, Yvette Davis, Fiona Holloway, George Bugg; Derriford Hospital, Plymouth: Ross Welch, Heidi Hollands; University Hospital of North Staffordshire, Stoke-on-Trent: Peter Young; City Hospitals Sunderland NHS Foundation Trust, Sunderland: Kim Hinshaw, Amanda Bargh, Dawn Edmundson, Helen Cameron; URUGUAY: Pereira Rossell Hospital, Montevideo: Justo Alonso, Alfonso Garcia Austt, Alejandra Ortiz; USA (57): University of South Carolina, Columbia: Judith Burgis, Stanette Brown, Anthony Gregg; University of Iowa Hospitals and Clinics, Iowa City: Kristi Borowski, Diedre Fleener; Jamaica Hospital Medical Center, Jamaica: John Deaver, Melanie Summersille; Texas Tech UHSC, Lubbock: Christine Aronoff, Kimberly Bland; University of Miami, Miami: Eftichia Kontopoulos, Yvette Rivero; East Bay Perinatal Medical Associates, Oakland: Stuart M Lovett, Shana Zatinsky, Mary Diogo; Maricopa Medical Center, Phoenix: Dean V Coonrod, Blanca Flor Jimenez.
