# Supplementary material for: Maternal outcomes at 3 months after planned caesarean section versus planned vaginal birth for twin pregnancies in the Twin Birth Study: a randomised controlled trial
Source: PubMed Central journal article supplement — BJOG. 2015 Aug 20;122(12):1653–62. doi: 10.1111/1471-0528.13597 (PMC5014197; doi:10.1111/1471-0528.13597), 2015-08-20
Supplement: BJO-122-1653-s015.pdf [file BJO-122-1653-s015.pdf]

To view the full contents of this document, you need a later version of the PDF viewer. You can upgrade to the latest version of Adobe Reader from [www.adobe.com/products/acrobat/readstep2.html](http://www.adobe.com/products/acrobat/readstep2.html)

For further support, go to [www.adobe.com/support/products/acrreader.html](http://www.adobe.com/support/products/acrreader.html)
